# Supplementary material for: Molecular serotype-specific identification of Streptococcus pneumoniae using loop-mediated isothermal amplification
Source: PubMed Central journal article supplement (PMC6934563; doi:10.1038/s41598-019-56225-0), 2019-12-27
Supplement: 41598_2019_56225_MOESM1_ESM.pdf [file 41598_2019_56225_MOESM1_ESM.pdf]

## Supplementary Materials

### **Molecular serotype-specific identification of *Streptococcus pneumoniae* using loop-mediated isothermal amplification**

Chika Takano<sup>1, 2\*</sup>, Yoko Kuramochi<sup>3\*</sup>, Mitsuko Seki<sup>1, 4</sup>, Dong Wook Kim<sup>5, 6</sup>, Daisuke Omagari<sup>7</sup>, Mari Sasano<sup>1, 8</sup>, Bin Chang<sup>9</sup>, Makoto Ohnishi<sup>9</sup>, Eun Jin Kim<sup>5, 6</sup>, Kazumasa Fuwa<sup>2</sup>, Paul E. Kilgore<sup>10</sup>, Tomonori Hoshino<sup>4</sup> & Satoshi Hayakawa<sup>1</sup>

<sup>1</sup>Division of Microbiology, Department of Pathology and Microbiology, Nihon University School of Medicine, Tokyo, 173-8610, Japan; <sup>2</sup>Department of Pediatrics and Child Health, Nihon University School of Medicine, Tokyo, 173-8610, Japan; <sup>3</sup>Nihon University School of Medicine, Tokyo, 173-8610, Japan; <sup>4</sup>Department of Pediatric Dentistry, School of Dentistry, Meikai University, Saitama, Japan; <sup>5</sup>Department of Pharmacy, College of Pharmacy, Hanyang University, Ansan, 15588, Republic of Korea; <sup>6</sup>Institute of Pharmacological Research, Hanyang University, Ansan, 15588, Republic of Korea; <sup>7</sup>Nihon University School of Dentistry, Tokyo, 101-8310, Japan; <sup>8</sup>Department of Neurological Surgery, Nihon University School of Medicine, Tokyo, 173-8610, Japan; <sup>9</sup>Bacteriology I, National Institute of Infectious Diseases, Tokyo, 162-8640, Japan; <sup>10</sup>Department of Pharmacy Practice, Eugene Applebaum College of Pharmacy & Health Sciences, Wayne State University, Detroit, MI, 48201, USA.

\*These authors contributed equally to this work.

Correspondence and requests for materials should be addressed to M.S. (email:

mitsuko.seki@dent.meikai-u.ac.jp) and D.W.K. (email: dongwook@hanyang.ac.kr)

**Fig. S1.** Nucleotide sequence of the *S. pneumoniae* serotype-specific genes used to design the pneumococcal serotyping LAMP primers. The sequences used for the LAMP primers are indicated by arrows. (a) to (l) in the figure are the sequences for *S. pneumoniae* serotype-specific genes for serotypes 4, 6B, 9V, 14, 18C, 19F, 23F, 1, 3, 5, 7F, and 19A, respectively.

**Fig. S1 (a)** Target, serotype 4; GeneBank no. CR931635; Gene, *wzy*

|                     |                                                                               |                       |
|---------------------|-------------------------------------------------------------------------------|-----------------------|
| No.                 | 9677                                                                          | 9746                  |
| sequence            | TTGCTTTCTA ATTATTTTTC AAATTACTGG TTTTATTTTA CAAAAGTTA GTATATATGA TTTTCTGTGA   |                       |
| No.                 | 9747                                                                          | 9816                  |
| sequence            | TGGTATCTGA TTTTATCTTA TTTTTTATG TTTGGATTAA TTTTCAATGA GTATATGGGG TTTCAAACAA   |                       |
| No.                 | 9817                                                                          | 9886                  |
| sequence            | CTCTGCTGTG GAGCCCTAGT AACTTCTATA ATAATGAAGA ATTATTTTCAT TCATATATTT TTATAATTTG |                       |
| No.                 | 9887                                                                          | 9956                  |
| sequence<br>pr imer | GATTTTGTTT TGTATTCTG TAGGCTATTT ATTTTTTTAT AGTGATGGAA AGGTACATTA TCATTCAGAA   | -----                 |
| No.                 | 9957                                                                          | 10026                 |
| sequence<br>pr imer | GTACAAAATT ATCAGGAAAA TGAAGAGAAA ATTTTGTACA ATGCGGGTAG GATTTTAAACA GGAGTGGGCT |                       |
|                     | -----F3----->                                                                 | -----F2-----> <-----  |
| No.                 | 10027                                                                         | 10096                 |
| sequence<br>pr imer | TTATTTCTAG GGTAATAACT GATTCTAAAA CAGTACTAGC AGTTAGAGCG GCGAATAGCT ATTCAGCATA  |                       |
|                     | -----LF-----                                                                  | <-----F1-----   ----- |
| No.                 | 10097                                                                         | 10166                 |
| sequence<br>pr imer | TTCAGAGGCA GCTAGTTCAG GAATAATAGA TGATTTAGGA GTACTTATGC TTCCTGGTGT GTTCTCCTTG  |                       |
|                     | -----B1----->  -----LB-----> <-----B2-----                                    |                       |
| No.                 | 10167                                                                         | 10236                 |
| sequence<br>pr imer | TTTTATTCAG ATAAGCTGTC CCGAGTTATA AAGCGTACTA TTTTTGGGT AATGTTGTTT TACCTAATTT   |                       |
|                     | <-----B3-----                                                                 |                       |
| No.                 | 10237                                                                         | 10306                 |
| sequence            | TGATAATGAT CCTAACAGGA AGTCGTAAAA TCCAGGTGTT TTCAATCTTG GCGTTGGTTT TAGTATACAC  |                       |
| No.                 | 10307                                                                         | 10376                 |
| sequence            | ACAATCTTTA GGGATTACTT TTTCGAAGAA AAGAGTACTT GTATTTTTAA TAGTAACTGT ATTTCTATTA  |                       |

Fig. S1 (b) Target, serotype 6A, 6B, 6C, 6D; GeneBank no. CR931639; Gene, *wciP*

|                    |                                                                                                                      |      |
|--------------------|----------------------------------------------------------------------------------------------------------------------|------|
| No.                | 8410                                                                                                                 | 8479 |
| sequence           | GGAGCTTATT ACAATTTTT TAATCTAATT GAATACGTTA AAAACAATTA TCAATTTGAT TATTACTTTT                                          |      |
| No.                | 8480                                                                                                                 | 8479 |
| sequence           | TTTGTGATCA AGATGATATT TGGAAAGAGC ACAAGTTAGA AATACAGCTG TTAAGATTTT CTAAAGATGA                                         |      |
| No.                | 8550                                                                                                                 | 8619 |
| sequence           | CATGCCAGAG ATGGTTTACT CTGATATGTC AACGATTGAT GCCAGTAATA ATTTGATAGA TATTAGTATA                                         |      |
| No.                | 8620                                                                                                                 | 8689 |
| sequence<br>primer | AATAAAATAA TGGGGATTGA ATTACCGAAC ATAAATAATT TGTATTTTAT TCATGCCTAT ATCTGGGGGT<br> -----F3----->  -----F2-----><---    |      |
| No.                | 8690                                                                                                                 | 8759 |
| sequence<br>primer | GTACTGCAGG TTTTAATCAT GCATTGCTAG AGATGGTTCC TTCAGTTGAT ATTGATAAAG ATTATTTATA<br>-----LF----- <-----F1-----           |      |
| No.                | 8760                                                                                                                 | 8829 |
| sequence<br>primer | TATAGAAAAA CTGTCTCATG ATAATTATTT TGCAAAGTTT GCACTAGAGT ATGGGAAGGT GTTGTCTCTGC<br> -----B1-----> -----LB-----> <----- |      |
| No.                | 8830                                                                                                                 | 8899 |
| sequence<br>primer | CCTGAGCAAC TGGTCTTGTA TCGAAGACAT GGACATAATG TAACAACCTAG TCATCATTTT AAATTATCTC<br>----B2----  <-----B3-----           |      |
| No.                | 8900                                                                                                                 | 8969 |
| sequence           | CGCTAAATGT TTTCAGAAAG GCTATATTGG GTTTC AATGA ATTGGCACTT ACACATGCTG GGGTATATAA                                        |      |
| No.                | 8970                                                                                                                 | 9039 |
| sequence           | TGAAACTCTT TATATGCTAA AAAAAGCTTC TGGAAAAAAT CCTTTAAGTG ATAGACTACT TGAAATTCAG                                         |      |

Fig. S1 (c) Target, serotype 9V, 9A; GeneBank no. CR931648; Gene, *wzy*

|                      |                                                                                                                            |       |
|----------------------|----------------------------------------------------------------------------------------------------------------------------|-------|
| No.                  | 10306                                                                                                                      | 10375 |
| sequence             | GTTCGGAATT TTATCATTTT TAACACAATC CAGTACAGCG ATTATATGTT ATGTGCTTTT TATTTTATG                                                |       |
| No.                  | 10376                                                                                                                      | 10445 |
| sequence             | CGTATGTTAG GTTTAAAGGA AAATATAGGA AAACCATATT CTTTAGTCAG TATAACTGTG TATATTTGTT                                               |       |
| No.                  | 10446                                                                                                                      | 10515 |
| sequence             | TTAGTTTTTC TATAATTTTT TCACAAAGTA CAATTTTATC AACTTTTACA GCAATTTTTT CCAAAAATGC                                               |       |
| No.                  | 10516                                                                                                                      | 10585 |
| sequence<br>pr i mer | AACCTTTTCA GGACGTATCA ATATTTGGCA GTTAGCGATT CGTATTTTTG AAGAAAATTT TTGGTTTGGA<br> -----F3----->  -----F2-----               |       |
| No.                  | 10586                                                                                                                      | 10655 |
| sequence<br>pr i mer | AAAGGACTTA ATATTGATTT CAATGCTTGG ACAAATGGGA TTATCGTTAA CTCGCACAC AATACCTTAC<br>-----> <-----LF-----  <-----F1-----   ----- |       |
| No.                  | 10656                                                                                                                      | 10725 |
| sequence<br>pr i mer | TAGATATACT TGCTCGAACG GGTATATTTT CGGGTATTTT ATTTGTAGTG GTTCTTCTAA GTCTATTTCT<br>-----B1----->  -----LB-----> <-----B2----- |       |
| No.                  | 10726                                                                                                                      | 10795 |
| sequence<br>pr i mer | TGGAAAATAT AGAGTAAAAT CAAAACGCT ACTGACAATG TTGATTTTTCAT TCATGGTTTA TATTACGATG<br>----  <-----B3-----                       |       |
| No.                  | 10796                                                                                                                      | 10865 |
| sequence             | GAGGCTACAT CTGTAAGTAT TCTTCTATTA ATAATTGCTA TTTGTGTGTA TTGGTCTTTT GGAGAGGAGA                                               |       |
| No.                  | 10866                                                                                                                      | 10888 |
| sequence             | AGTTATATGA GCAAGTTACT TAA                                                                                                  |       |

Fig. S1 (d) Target, serotype 14; GeneBank no. CR931662; Gene, *wzy*

|                 |                                                                                                                                  |      |
|-----------------|----------------------------------------------------------------------------------------------------------------------------------|------|
| No.             | 7661                                                                                                                             | 7730 |
| sequence        | ATTTAGATTT TTTACACAAA CTATCATTTT TGCTTTTCTT CTAGAGGTTT TGGTACTAAG CAAATCTAGA                                                     |      |
| No.             | 7731                                                                                                                             | 7800 |
| sequence        | ATAGCGATTG TTGCAATGCT TATATATATA GCATTTGCAG TAGTCAATGA GATTAATTCA AACAATAAAT                                                     |      |
| No.             | 7801                                                                                                                             | 7870 |
| sequence        | GGCTTATTGG AATTTTCTGT CCAATTATTC CTTTTATGTT ATTTTACAAT TTTGAAAAAA TTAACAGAT                                                      |      |
| No.             | 7871                                                                                                                             | 7940 |
| sequence primer | TTTTTTTCAA ATGTTTAGTT CTAGATCGGG TAGCAATGCG ACACGCTTTA GAGTGTATGA GGAATCCCTA<br> -----F3-----                                    |      |
| No.             | 7941                                                                                                                             | 8010 |
| sequence primer | AAAGCTATTA ATGGAATGGA AATGTTACTT GGCGCAGGTG TCAGAATTCC CTCTACAGTA GATATATTAT<br>----->  -----F2-----><-----LF----- <-----F1----- |      |
| No.             | 8011                                                                                                                             | 8080 |
| sequence primer | TGGGGTCACA TTCTATGTAT ATAAGTTTTA TTTATAGGAC AGGAGTTTTA GGAAGTATAA TAATAACAGT<br>-----   -----B1----->  ---                       |      |
| No.             | 8081                                                                                                                             | 8150 |
| sequence primer | AATGTTTTAT TATCTGTTTT CTAAATTTTT AAAATGTGAT TCATCTGAGA GACTAAGAAG TATTGGCTAT<br>-----LB-----> <-----B2-----                      |      |
| No.             | 8151                                                                                                                             | 8220 |
| sequence primer | ATTCTAGCTT TGTCAGTATT TTGGCTTTTT GAAGAGTTAG ATCCACATTA TTGGTGTTTA ATTTTATTTT<br><-----B3-----                                    |      |
| No.             | 8221                                                                                                                             | 8273 |
| sequence        | TTTCAACAAT AAGTATTTTC ATAAACAATA GAAAAGAGGA AATAGTTGGA TGA                                                                       |      |

Fig. S1 (e) Target, serotype 18 (18A, 18B, 18C, 18F); GeneBank no. CR931673; Gene, *wzy*

|                    |                                                                                                                             |       |
|--------------------|-----------------------------------------------------------------------------------------------------------------------------|-------|
| No.                | 12718                                                                                                                       | 12787 |
| sequence           | CTTAAACGAA TCGTTCTTTT GAGTGTATTA ATTATCATAC CAGTATTTTT GGTAATTTAT TGGTATGATA                                                |       |
| No.                | 12788                                                                                                                       | 12857 |
| sequence           | AAAAAGTAAG TAAACTAGGG AAAGAACGAA AAATTTAAG TTTATTAAT ATCTTTTCTT TAATATTTAT                                                  |       |
| No.                | 12858                                                                                                                       | 12927 |
| sequence           | AACAGGAATA TTCCTTTATG TTTATAGTGT AAAATCTGAT TTTATATATA CATTATTCA AGAACATAAT                                                 |       |
| No.                | 12928                                                                                                                       | 12997 |
| sequence<br>primer | ATTAATTCGA TGGCTAGAAC AGATTTATGG AAGGGAGTTG AATCAACCTA TAATTTCGCC CCTATATTTA<br> -----F3----->  -----F2-----> <-----LF----- |       |
| No.                | 12998                                                                                                                       | 13067 |
| sequence<br>primer | TGGGGAGAGG GATAGGGTTT GTAACAAAAT GGATGGATAA TAATTGGATG ACTTTGAATA TCAATGGTCT<br>-- <-----F1-----   -----                    |       |
| No.                | 13068                                                                                                                       | 13137 |
| sequence<br>primer | TACAGGGACA ATGGGGATCC ATAATGATAT TTTGAAGTAC TACATTGAGA TAGGATTTGT AGGATTATTT<br>-----B1-----> -----LB-----> <-----B2-----   |       |
| No.                | 13138                                                                                                                       | 13207 |
| sequence<br>primer | ATTTATTTTT ACACTCTTCT TTATAGAAAT GCTAAACGTA TATTTGTAAA AATTGGTCAT AAAGAATCAT<br><-----B3-----                               |       |
| No.                | 13208                                                                                                                       | 13277 |
| sequence           | TCATATATTT TGTATTGATA ATGTTTCAGA TGCTGATATG GTTTACAGAT AATATTTCAA TTTACCATAA                                                |       |
| No.                | 13278                                                                                                                       | 13347 |
| sequence           | TTTTTTATGG ATCCTAAATC TACTACTCTT TTCTTTAACT AATTCGGATA CAGAATTGGA AAATTTAGAT                                                |       |

Fig. S1 (f) Target, serotype 19F; GeneBank no. CR931678; Gene, *wzy*

|          |                                                                               |       |
|----------|-------------------------------------------------------------------------------|-------|
| No.      | 11370                                                                         | 11439 |
| sequence | ATATTTTGG ATATACTTTT ATTAATAATT TTCTTATCTA TCGCCATAAA CGCCCTAAAG ACATATTACT   |       |
| No.      | 11440                                                                         | 11509 |
| sequence | TTTAGTACCT TTATTAATAT TTATTTCAAA AACTTTAATA TCAGGAGGCC GGCAAGATAT TATTAATAATT |       |
| No.      | 11510                                                                         | 11579 |
| sequence | CTGATTGCCT ATGTAATCAT GATGTATATC CAACAAAAAC GGAAAGTTGG ATGGAATAGA GTCATATCTC  |       |
| No.      | 11580                                                                         | 11649 |
| sequence | ATAAATATAT TCACCTTGGG TTTGTTGGTT TAATAGCAGG TATTCCAGCA TTTTACTACT CTTTGTITTTT |       |
| primer   | -----F3-----> -----F2-----<-----                                              |       |
| No.      | 11650                                                                         | 11719 |
| sequence | AGCCGGTCGT TCAACGACTA GGACGCTATT TGAGAGTGTT TCGACCTATC TAGGAGGCTC AATTCAGCAT  |       |
| primer   | -----LF-----  <-----F1-----   -----B1-----                                    |       |
| No.      | 11720                                                                         | 11789 |
| sequence | TTAATCAGT ATATTGAAAA TCCATTAGAT CCTGGTGAAG TTTTGGCAG TGAAACATTG GTGCCTATAT    |       |
| primer   | ----->  -----LB-----<-----B2-----                                             |       |
| No.      | 11790                                                                         | 11859 |
| sequence | TAAATATATT AGGGGAAATG GGCCTAGTTA ATTATCGTAG TACAATTCAT TTAGAATTTT GGACACTAGG  |       |
| primer   | <-----B3-----                                                                 |       |
| No.      | 11860                                                                         | 11929 |
| sequence | AGTACTGTA GGAAATGTTT AACTTTTTT TAGAAGACCC TTGCATGATT TTGGTCTAGT TGGTATGTAT    |       |
| No.      | 11930                                                                         | 11999 |
| sequence | GTATTTGTCT TTGCTGTAGG TGCTTTTTT GCTATTTATT ATTTAGTTCT GAGAAAGAAA CAGGTTGGTT   |       |

Fig. S1 (g) Target, serotype 23F; GeneBank no. CR931685; Gene, *wzy*

|          |               |               |               |               |               |               |            |      |
|----------|---------------|---------------|---------------|---------------|---------------|---------------|------------|------|
| No.      | 8841          |               |               |               |               |               |            | 8910 |
| sequence | CAATTACAAT    | TTAGTTTCC     | TATATTCTAC    | TATATGTCAG    | CAGAAAATAT    | GACGCTAAAC    | ATCAGATTGA |      |
| No.      | 8911          |               |               |               |               |               |            | 8980 |
| sequence | TAGTTTTGTA    | TTATGGTTAG    | ATCTTTTTTT    | ACTTTTAATA    | TCTAATACGC    | GAACAGTTTA    | TATAATACTA |      |
| No.      | 8981          |               |               |               |               |               |            | 9050 |
| sequence | GTTGTTTTTT    | GGATTATTAT    | TAATAGAAAT    | TTTATAAATA    | ATATTAATAA    | AGAGCATAGA    | CTGGTAGTGA |      |
| No.      | 9051          |               |               |               |               |               |            | 9120 |
| sequence | CAGCAACGAC    | AATAGTCATC    | TCTTTACTGG    | CGTTAACATT    | TTTTTTCAAA    | CATATAATTA    | ATAATAGTGA |      |
| primer   |               |               |               | -----F3-----> |               |               |            |      |
| No.      | 9121          |               |               |               |               |               |            | 9190 |
| sequence | ATCATATAGC    | CATCGAGTGT    | TAGGTGTTGT    | GAATTTTTTT    | AAATATTATG    | AATCAGATAG    | GTTTCATTG  |      |
| primer   | -----F2-----> |               | <-----LF----- |               |               |               | <-----     |      |
| No.      | 9191          |               |               |               |               |               |            | 9260 |
| sequence | TTTTTTGGGG    | ATGCTGAATT    | AGCCTTTGGA    | AATACGACGA    | AGGGTTATGG    | ACACAATATT    | AGAAGTGTGT |      |
| primer   | --F1-----     |               | -----B1-----> |               | -----LB-----> |               |            |      |
| No.      | 9261          |               |               |               |               |               |            | 9330 |
| sequence | TAGGTTGGGA    | TGGAACGGTA    | GAGATGCCTT    | TACTCAGTGT    | AATGATTAAT    | AATGGTTATG    | TTGGGTTAGT |      |
| primer   |               | <-----B2----- |               |               |               | <-----B3----- |            |      |
| No.      | 9331          |               |               |               |               |               |            | 9400 |
| sequence | TGGTTACATT    | ATAGTGCTGT    | TTAAGTTTAT    | ATCTTCAATA    | ATCTCAGTTA    | AAAATAGCAC    | AAAAAAAAAT |      |
| primer   | -             |               |               |               |               |               |            |      |
| No.      | 9401          |               |               |               |               |               |            | 9470 |
| Sequence | ATTGGATTAT    | CAATCTTTAT    | TCCGTTACTT    | CTATCTGCAA    | CAGTTGAAAA    | TTATATCGTC    | AACATTAGCT |      |
| No.      | 9471          |               |               |               |               |               |            | 9540 |
| sequence | TTGTATTCAT    | GCCTGTCTGC    | TTTTGTATTT    | TATGTTCAAT    | TAAAAATATA    | AAATTAGTAA    | ATAACAGAAA |      |



Fig. S1 (h) Target, serotype 1; GeneBank no. CR931632; Gene, *wzy*

|                     |                                                                                                                                  |       |
|---------------------|----------------------------------------------------------------------------------------------------------------------------------|-------|
| No.                 | 10334                                                                                                                            | 10403 |
| sequence            | ACAGGGGAAA GAGATTATAT GTTTACTTTA TTCATCCTTG ATGTGATTAT ATTATTTTAC TTTCACAAAA                                                     |       |
| No.                 | 10404                                                                                                                            | 10473 |
| sequence            | TAAAACGTTT TTATCTTGTA ATGTTAGTTC CGCTTGCGGC ACTACTGATT CCGTTATCTG CAGTTTTTAA                                                     |       |
| No.                 | 10474                                                                                                                            | 10543 |
| sequence            | ATATACTTTA TTAAGTGCGC AAGTTTCATC TATAAATACA AATAATATTT GGTTCGATTT GCTAGATGGT                                                     |       |
| No.                 | 10544                                                                                                                            | 10613 |
| sequence<br>pr imer | GAGTTTGTAT CAGCTAGTCG TAATTTACAG ATTCTGATAT TACATAATAT GGGCAATTAT TTCGAAGGTC<br> -----F3----->  -----F2-----                     |       |
| No.                 | 10614                                                                                                                            | 10683 |
| sequence<br>pr imer | GTTCTTTTTT TAATGACATA GTAAGAATTT TTTATAATAC GGGGTATTCT AATCAAACCTT GGTTCATGGA<br>-> <-----LF-----  <-----F1-----   ---           |       |
| No.                 | 10684                                                                                                                            | 10753 |
| sequence<br>pr imer | CACCTTTTTT CCAAACGTAC ATTCAACCAA ATATGGTTTT ACTCTTGTGG GAGAGGGATA TGTGAATGGA<br>-----B1----->  -----LB-----> <-----B2-----  <--- |       |
| No.                 | 10754                                                                                                                            | 10823 |
| sequence<br>pr imer | GGATACTTTG GAATTGTAAT GATTTTTATG CTAACAGGCT TTTTGATGAG ATTTCTTTA TATAACGCTC<br>-----B3-----                                      |       |
| No.                 | 10824                                                                                                                            | 10893 |
| sequence            | AAAGAAATAT ATACGGGATG CTGATATATC TGTATATGAT ACCTATTTTT ATTTATTCTA CTCGTGCTGA                                                     |       |
| No.                 | 10894                                                                                                                            | 10963 |
| sequence            | TTTTGCTAAC ATATTATCTC CATTACTTAA ATATGCTATA TTGGGAACAT TGGTTATTGT TTTTATCAAT                                                     |       |

Fig. S1 (i) Target, serotype 3; GeneBank no. CR931634; Gene, *galU*

|                 |               |               |               |            |            |            |            |
|-----------------|---------------|---------------|---------------|------------|------------|------------|------------|
| No.             | 8783          |               |               |            |            |            | 8852       |
| sequence        | CTGATATTAA    | AGTACATTTG    | GTTGGTCAAA    | GTTACCACAG | TGGTCTTGGT | GACGCTGTTG | TCCAAGCGAA |
| No.             | 8853          |               |               |            |            |            | 8922       |
| sequence        | GTCTTTTGTT    | GGTGACGATC    | CCTTTGTTGT    | AATGCTTGGT | GATGACCTTA | TGGATATCAC | CGACTCAACT |
| No.             | 8923          |               |               |            |            |            | 8992       |
| Sequence primer | GCTGTACCTT    | TAACAAGACA    | ATTGATGGAT    | GATTACAAGG | CAACACAGGC | TTCAACTATC | GCAGTAATGC |
|                 |               |               |               |            |            |            | -          |
| No.             | 8993          |               |               |            |            |            | 9062       |
| sequence primer | CTGTTAGATA    | TGAAGATGTT    | TCTTCTTATG    | GTGTGATTC  | TCCTAGATTG | GAAAGTAGTA | ATGGCCTCTA |
|                 | -----F3-----> | -----F2-----> | <-----LF----- |            |            |            |            |
| No.             | 9063          |               |               |            |            |            | 9132       |
| sequence primer | TAGTGTGGAT    | GCTTTTGTAG    | AGAAACCAAA    | ACCAGAAGAA | GCGCCTAGCA | ATTTAGCTAT | TATTGGACGT |
|                 | <-----F1----- |               |               |            |            | -----      |            |
| No.             | 9133          |               |               |            |            |            | 9202       |
| sequence primer | TATCTACTTA    | CTCCTGAGAT    | TTTTTCTATA    | TTAGAAACCC | AAAAGCCAGG | AGCAGGTAAT | GAAATTCAAT |
|                 | -----B1-----> | -----LB-----> | <-----B2----- | <          |            |            |            |
| No.             | 9203          |               |               |            |            |            | 9272       |
| sequence primer | TGACAGATGC    | TATTGATACA    | TTGAATAAGA    | CACAGAGTGT | TTTTGCGCGT | GAATTTGTGG | GCAAACGTTA |
|                 | -----B3-----  |               |               |            |            |            |            |
| No.             | 9273          |               |               |            |            |            | 9342       |
| sequence        | TGATGTTGGT    | GATAAGTTTA    | ATTTTATGAA    | AACATCAATT | GATTATGCTC | TTCAACATCC | TCAGATTA   |
|                 |               |               |               |            |            |            |            |
| No.             | 9343          |               |               |            |            |            | 9412       |
| sequence        | GAGAGTTTAA    | AAAATTACGT    | TATTGCACTT    | GGTAAGCAAT | TGGAGAAGCT | AGATGACTGT | TCGTCAAGTG |

Fig. S1 (j) Target, serotype 5; GeneBank no. CR931637; Gene, *wzy*

|                    |               |               |               |               |              |            |            |  |      |
|--------------------|---------------|---------------|---------------|---------------|--------------|------------|------------|--|------|
| No.                | 6773          |               |               |               |              |            |            |  | 6842 |
| sequence           | TATCAATAAT    | CTATTTTTAA    | GGGTCACATC    | TGAATATCGA    | CCATCTAGTC   | TGACTTTGGA | CTACGTTTCC |  |      |
| No.                | 6843          |               |               |               |              |            |            |  | 6912 |
| sequence           | TCCAACCGTT    | TTGTGTATTT    | TGAGATCTTT    | GCTAAAGAAA    | TTTCAGGACA   | TGAATTAACA | GGGATTGGTT |  |      |
| No.                | 6913          |               |               |               |              |            |            |  | 6982 |
| Sequence           | ATTATTATAT    | GGATAATTTT    | TTTCTAGAGA    | GTTTTCTCAA    | TTATGGTTAT   | ATAGTAGGGA | CTGCTTTTGT |  |      |
| No.                | 6983          |               |               |               |              |            |            |  | 7052 |
| sequence<br>primer | TTTAATAGCC    | TTGTCTCCCA    | TGATTTATGC    | CCTCTTGCAA    | CGTTCTTCTT   | CTCATCGTTT | CCGCATGCTT |  |      |
|                    |               |               | -----F3-----> | -----F2-----> | <-----LF---- |            |            |  |      |
| No.                | 7053          |               |               |               |              |            |            |  | 7122 |
| sequence<br>primer | TTTTTAGCCC    | TTGCTTTTTC    | TTATACTGTC    | AATGCCTTAT    | TTGAAGGTTA   | CGCGCCATTT | GGTCCTGGTG |  |      |
|                    | -----         | <-----F1----- | -----B1-----> | -----         |              |            |            |  |      |
| No.                | 7123          |               |               |               |              |            |            |  | 7192 |
| sequence<br>primer | CCAAGAGTTT    | TATTCTTTGG    | TTAGTTTTTG    | GTTGCCTTCT    | GAATACACGA   | ATTGGAAAGG | TTGGTGAACA |  |      |
|                    | -----LB-----> |               | <-----B2----- |               |              | <-----     |            |  |      |
| No.                | 7193          | 7208          |               |               |              |            |            |  |      |
| sequence<br>primer | TTCTGAAACA    | AGTTAG        |               |               |              |            |            |  |      |
|                    | ---B3---      |               |               |               |              |            |            |  |      |

Fig. S1 (k) Target, serotype 7F, 7A; GeneBank no. CR931643; Gene, *wzy*

|                 |                                                                                                                     |       |
|-----------------|---------------------------------------------------------------------------------------------------------------------|-------|
| No.             | 15065                                                                                                               | 15134 |
| sequence        | ATTATGTATC AGATAATTCG AGTTTAGTTA TTTAACAAG TTATATCGTT TCAACTCTAT ACGTAGCTGC                                         |       |
| No.             | 15135                                                                                                               | 15204 |
| sequence        | TTTGT CAGAG TAAAGATTA TTTTGTGGA ATTACCTATT ATTATTATT TGACTTTACT ATTTAAAGA                                           |       |
| No.             | 15205                                                                                                               | 15274 |
| Sequence        | TTAGGAATAA AAATACTGCT TAAAATAATA TCTATCACTT GCATAGTGGT GGTCGCTTTG GCAATCTCAA                                        |       |
| No.             | 15275                                                                                                               | 15344 |
| sequence primer | TTCCTATTTT ATATGAATTA TTCCTATAT TTGACAATTT TTTTAAATTA GAAAATTAT TTGGCTATTC<br> -----F3-----                         |       |
| No.             | 15345                                                                                                               | 15414 |
| sequence primer | AACAGGAAAC TATTCAACTA GTTCTGATTT TGGTCGGTTA AGTTCAATTG TTCAAATAAT CTCAACTATT<br>----->  -----F2-----> <-----LF----- |       |
| No.             | 15415                                                                                                               | 15484 |
| sequence primer | TTTTATGGAG ATGTTTGGCA GACTTTATTT GGTATTGGTT TAGGAGAGGC GGAAATTTC A AAATTCCGA<br><-----F1-----   -----B1-----> -     |       |
| No.             | 15485                                                                                                               | 15554 |
| sequence Primer | TATTTAGTGG TTCCTTTTAT TATAATTACG AATACACCCA TTA CTATCTG TTCAC TTTAT CATATGTTTT<br>-----LB-----> <-----B2-----       |       |
| No.             | 15555                                                                                                               | 15624 |
| sequence primer | TATTGAGAAT GGATTTATAG GATTGTTCTT ATTCATGTTT ATGCCAATTT ACCTTGCTTT AAAGATGATT<br><-----B3-----                       |       |
| No.             | 15625                                                                                                               | 15694 |
| sequence        | TTTGAGCGAG GGACATCTAA ATATGATCTT CTTCTGATAG TATTATCTAT TTCTTTATTT ATGCTCTTGT                                        |       |
| No.             | 15695                                                                                                               | 15764 |
| sequence        | TGTATAATAA TACAATGAGG TCAGAGATAT ATTATCTTTA TTTATTTGTT CTTTCATGGG GAGTTGCAAT                                        |       |

Fig. S1 (l) Target, serotype 19A; GeneBank no. CR931675; Gene, *wzy*

|                    |               |               |               |               |            |               |            |  |      |
|--------------------|---------------|---------------|---------------|---------------|------------|---------------|------------|--|------|
| No.                | 9327          |               |               |               |            |               |            |  | 9396 |
| sequence           | AAGATTTGAT    | AGCTCCGCCA    | GTTGTCATGT    | CTGTTATGTT    | TCTCATTAGT | TCTGTATTTG    | CCCTTATTAA |  |      |
| No.                | 9397          |               |               |               |            |               |            |  | 9466 |
| sequence           | TGTGCAAAAC    | TGGAATATTG    | AGTATAGTGG    | TTAGCTTAT     | CTTTTGATTA | TTAGTGGCAT    | TATTGTTTTT |  |      |
| No.                | 9467          |               |               |               |            |               |            |  | 9536 |
| Sequence           | TCAATGCCTC    | TCTTGGCTCT    | TAATTCGCCT    | AGTCTAAATA    | CCAAGATTAA | AGTGACGGAT    | CGGCTCATTG |  |      |
| No.                | 9537          |               |               |               |            |               |            |  | 9606 |
| sequence<br>primer | ATATCCAATT    | CTGGAAAATA    | GCTCTTACTA    | TTATAGTTGA    | CCTCATTATT | CTATATCTTT    | ATAGGAGAGA |  |      |
|                    |               |               | -----F3-----> |               |            |               | -----      |  |      |
| No.                | 9607          |               |               |               |            |               |            |  | 9676 |
| sequence<br>primer | GATTCATAAT    | CTTGCACTTA    | GCCATGGTTA    | TACGGGTTCA    | AATTTTCAGT | GGTTCCTTAG    | AAATGCTACC |  |      |
|                    | ----F2----->  |               |               | <-----F1----- |            |               | ---        |  |      |
| No.                | 9677          |               |               |               |            |               |            |  | 9746 |
| sequence<br>primer | AGTTATGAAG    | GTGAGCTAAC    | AGTGCGAACT    | TCGATTCGGG    | TCCTCATTGG | TATCATTGAC    | GTATCTGCTT |  |      |
|                    | -----B1-----> | -----LB-----> |               |               |            | <-----B2----- |            |  |      |
| No.                | 9747          |               |               |               |            |               |            |  | 9816 |
| sequence<br>Primer | ATATTTTTGG    | ATATACTTTT    | ATTAATAATT    | TCTTCATTTA    | TAGTCATAAA | CGCTCTAAAG    | ATTTACTGCT |  |      |
|                    | -----         |               |               | <-----B3----- |            |               |            |  |      |
| No.                | 9817          |               |               |               |            |               |            |  | 9886 |
| sequence           | CTTAGTTCCA    | TTCTTGATTT    | TTATTTCTAA    | AACCTTATTA    | TCTGGGGGTA | GATTGGATAT    | TATAAAAATT |  |      |
| No.                | 9887          |               |               |               |            |               |            |  | 9956 |
| sequence           | TTAATTGCGT    | ATGTTGTAAT    | GGCCTATATT    | CAGCAAAAAC    | GAAAAGTTGG | CTGGGATAAG    | GTCATCTCCC |  |      |

Fig. S2. Sequence data of amplified products of the pneumococcal-serotype-specific LAMP. (a) to (l) in the figure are the sequences for the amplified products of *S. pneumoniae* serotype-specific genes for serotypes 4, 6B, 9V, 14, 18C, 19F, 23F, 1, 3, 5, 7F, and 19A, respectively.

(a)

TCTAAACAG TACTAGCAGT TAGAGCGGCG AATAGCTATT  
CAGCATATTC AGAGGCAGC

(b)

TAATCATGCA TTGCTAGAGA TGGTTCCTTC AGTTGATATT  
GATAAAGATT ATTTATATAT AGAAAACTG TCTCATGATA  
ATTATTTTGC AAAG

(c)

CCCGTTCGAG CAAGTATATC TAGTACACAC AATACCTTAC  
TAGATATACT TGCTCGAACG GG

(d)

CTACAGTAGA TATTTTATTG GGGTCACATT CTATGTATAT  
AAGTTTTATT TATAGGACAG GAGTTTTAGG AAGTATAATA A

(e)

GGAGAGGGAT AGGGTTTGTA ACAAATGGA TGGATAATAA  
TTGGATGACT TTGAATATCA ATGGTCTTAC AGGGACAATG GG

(f)

CGACTAGGAC GCTATTTGAG AGTGTTTCGA CCTATCTAGG  
AGGCTCAATT CAGCATTTTA ATCA

(g)

GGTTTCATTT GTTTTTTGGG GATGCTGAAT TAGCCTTTGG  
AAATACGACG AAGGG

(h)

ACGGGGTATT CTAATCAAAC TTGGTTTATG GACACCTTTT  
TTCCAAACGT

(i)

GTTGATGCTT TTGTAGAGAA ACCAAAACCA GAAGAAGCGC  
CTAGCAATTT AGCTATTATT GGACGTTATC TACTTACTCC TGA

(j)

TGCTTTTTCT TATACTGTCA ATGCCTTATT TGAAGGTTAC  
GCGCCATTT

(k)

TTTTATGGAG ATGTTTGGCA GACTTTATTT GGTATTGGTT  
TAGGAGAGGC GGAAATTTCA AAAATTCC

(l)

ACGGGTTCAA ATTTTCAGTG GTTCTTTAGA AATGCTACCA  
GTTATGAAGG TGAGCTAACA
